# Supplementary material for: New Components of Drosophila Leg Development Identified through Genome Wide Association Studies
Source: PLoS One. 2013 Apr 1;8(4):e60261. doi: 10.1371/journal.pone.0060261 (PMC3613359; doi:10.1371/journal.pone.0060261)
Supplement: Table S3 — Primers for gene cloning. (XLS) [file pone.0060261.s005.xls]

## Sheet: Table2-complete genes analyzed
Gene	Forward	Reverse	Associated segment
bnl	TTGCTTCATTCCTCGCTCCCT	ATTCTCGTCCTGGGTTCCGTT	Tibia
boi	CCGAAAGGAGATGAGGTGGTC	GAGCAATCCAGCAGCAAAGGA	Femur
CAH2	CTCCACTTGCCAGCCGCATTT	GGCTACGAGGGCAGACATGGA	Femur
CG10947	GATGAGTTCGCCGAGGAGCAA	GCTTTGTGTGCGGTTTCCGAG	Femur
CG13707	TATCACTGACCGTAACGCCGT	ATGTATTTAGTTAGAGAGACGGTTGGG	Tarsus
CG15012	GGGTTGCTACAGCGAGTGAAG	GATTCAAAGCGGCAGAATGTC	Tarsus
CG18317	ATTTCACACTGCGGCATCTCA	AGGGTCTGCCAGAAGGAGTTG	Femur
CG30371	CCTAATTCTTTCTGATCCCGC	GAGTTTCCGATCTTTTGGCGT	Tibia
CG32333	GCCTGCCACTTTGATTACGAT	ATTCACCGTCACCGAGGAGAT	Tibia
CG33218	ACGAGCACTAGCACACGAATA	CACATGCTTATTTCACTGCTG	Femur
CG3961	CTGCTGCGTGCCAAGAACTTT	GGCACATCCACCAGTTTCACA	Femur
CG42353	CAATCCCGCTGAGGTAACGAA	ACAGAAGCGTATGACACGGGC	Tibia
CG42354	TTTCGGTGATTTACCAACTAG	TTTAGTTAAATGTGGGCGATA	Tibia
CG43173	ACCATGCCCTTTTCACCCTGC	AGGCATTCAAATGGCGATCCC	Tarsus
CG43174	AGGACCAATTTACAACCGAGC	TAGCCCAATTTATCCCCTGTG	Tarsus
CG43444	TCAGGCGATTACAGCGGTTCC	TCGGCAGCAGGAGAACCCATT	Femur
CG5549	CGTGCTGGTCATCTTCCTGGT	CGATGCTGATGTGGACTTGGC	Femur
CG6841	GTATCCGACGACCGCCATGCT	CCTTTCGGGCGTTCTCGTAGG	Tarsus
CG7695	GCACGGTAGCAGTCAGTTGAC	GTTTTTGGTCAAGGTGCCTCT	Tibia
CG7949	CTGCGGACACACTGAAAGACA	CATGTAGTTAACCCTTGGCGG	Femur
CG9129	ATCACTCGTCCCAACCTCTGC	CTTCTTGGCTGGCACGGTCTT	Tibia
CG9134	ATGTTTTGATTGGCTGTGTCG	ACATGAGAAAATACAAGCGATCCT	Tibia
chinmo	GCGTGAAGCTGGAGAACTTGA	CAGTGGTGTTCGTTGTGGTTG	Tarsus
Cka	CCTACGATGCGAACTCCAAGG	CCAGGGAGATGTGGGTCTGTC	Tarsus
ckn	AATTACATGGGCGGCAGTCCT	CGGGAATGGGAGGAGAGTTTAGGA	Tarsus
CSN1b	CCAAGATGAAGAAGGCGGCTC	ATTCGGGCGAGTTGAGCAGTT	Tarsus
dpr8	CGGGCAACAACGGTAACTCTA	CTTAGACACTCCGCAAATCGC	Femur
eIF6	GCTCTGGCGTCCCAACATCAA	ATGCCCACGAAGGAGAGCCAG	Femur
GlcT-1	GTCACACCTACCATTGCCGCT	AATGGAGAGCAGCAGCCAGTC	Femur
Hexo1	CCTTCCACTGGCACATCACGG	CCGCTGCCCCGACTACATCTA	Tarsus
mspo	GCGGGCGGTTGTGTAGAATCT	TCGCCAGTCGGGATAGTGCTT	Femur
mys	GGTGGAGATGAAGGACAACGC	CGTATCCCACTTGGCGTTCAT	Tarsus
PI31	CTCCAAGCAAACGAAATGTAA	CGTGATGGAAAGCTGAACAGG	Femur
Piezo	CAGCAAACGGAAAGTGATGAA	AGTCTAACCGCCGCTACATCC	Tibia
RYBP	CGAAAGCCACGCCTGAACTCA	CGGCAGTTTCGAGTGGGTGTG	Tarsus
sick	CGAGCATTAAGAGCGGCATTC	GTGTGTTGGGAGCCGAGTTGA	Femur
ytr	AAGGACGACGAGGAACAATGC	GCAGCGTATGGAGGAAGTTTG	Femur
