# Supplementary material for: New Components of Drosophila Leg Development Identified through Genome Wide Association Studies
Source: PLoS One. 2013 Apr 1;8(4):e60261. doi: 10.1371/journal.pone.0060261 (PMC3613359; doi:10.1371/journal.pone.0060261)
Supplement: Table S4 — Source of RNAi Lines. (XLS) [file pone.0060261.s006.xls]

## Sheet: RNAiLines
Gene	Line #	Source
bnl	34572	TRiP
boi	108265	VDRC
CG10947	16116	VDRC
CG13707	29257	VDRC
CG15012	110721	VDRC
CG18317	100807	VDRC
CG30371	102030	VDRC
CG32333	100303	VDRC
CG3961	107281	VDRC
CG43444	110549	VDRC
CG6841	34254	VDRC
CG7695	102545	VDRC
CG9129	106740	VDRC
CG9134	108295	VDRC
chinmo	33638	TRiP
Cka	34522	TRiP
ckn	25222	VDRC
CSN1b	27303	TRiP
disco-r	101579	VDRC
eIF6	108094	VDRC
GlcT-1	108064	VDRC
ihog	102602	VDRC
mys	33642	TRiP
PI31	105476	VDRC
Piezo	105132	VDRC
RYBP	33974	TRiP
sick	103986	VDRC
