# Supplementary material for: New Components of Drosophila Leg Development Identified through Genome Wide Association Studies
Source: PLoS One. 2013 Apr 1;8(4):e60261. doi: 10.1371/journal.pone.0060261 (PMC3613359; doi:10.1371/journal.pone.0060261)
Supplement: Table S5 — Correlations between traits. Degree of significance from the lowest possible value (0) and the highest possible value (1) were also calculated (recorded in columns ‘t’ and ‘P-value’). Fe, femur proportion; Ta, tarsus proportion; Ti, tibia proportion; F, female, M, Male; A, both sexes; T1, first thoracic leg; T2, second thoracic leg. (XLS) [file pone.0060261.s007.xls]

## Sheet: Correlations
Correlation between	Separated By	In	r-squared	r	n	Interrelatedness (relationship to 0)		Independence (relationship to 1)
						t	P-value	t	P-value
TixFe	T1	M	0.020733	0.14399	117	1.56038	0.061	10.6121	<0.01
		F	0.05711	0.238977	117	2.63921	<0.01	10.4131	<0.01
		A	0.067609	0.260017	234	4.10154	<0.01	14.7076	<0.01
	T2	M	0.086655	0.294372	117	3.30315	<0.01	10.2486	<0.01
		F	0.105646	0.325032	117	3.68571	<0.01	10.1415	<0.01
		A	0.328089	0.572791	234	10.6435	<0.01	12.4853	<0.01
TaxFe	T1	M	0.530202	0.72815	117	11.3924	<0.01	7.35029	<0.01
		F	0.58895	0.767431	117	12.8363	<0.01	6.87537	<0.01
		A	0.588947	0.767429	234	18.232	<0.01	9.76546	<0.01
	T2	M	0.598363	0.773539	117	13.0892	<0.01	6.79619	<0.01
		F	0.607401	0.779359	117	13.3387	<0.01	6.71929	<0.01
		A	0.77696	0.881453	234	28.4284	<0.01	7.19342	<0.01
TaxTi	T1	M	0.613278	0.783121	117	13.5045	<0.01	6.66881	<0.01
		F	0.649561	0.805953	117	14.6	<0.01	6.34827	<0.01
		A	0.670148	0.818626	234	21.7105	<0.01	8.74789	<0.01
	T2	M	0.694515	0.833376	117	16.1694	<0.01	5.92712	<0.01
		F	0.7155	0.845872	117	17.0064	<0.01	5.71992	<0.01
		A	0.795681	0.89201	234	30.0579	<0.01	6.88491	<0.01
T1xT2	Fe	M	0.521135	0.721897	117	11.1871	<0.01	7.42088	<0.01
		F	0.475417	0.689505	117	10.2089	<0.01	7.76705	<0.01
	Ti	M	0.561656	0.749437	117	12.1388	<0.01	7.09997	<0.01
		F	0.528429	0.726931	117	11.3519	<0.01	7.36415	<0.01
	Ta	M	0.624101	0.790001	117	13.8179	<0.01	6.57483	<0.01
		F	0.65804	0.811197	117	14.876	<0.01	6.271	<0.01
MxF	Fe	T1	0.623811	0.789817	117	13.8093	<0.01	6.57737	<0.01
		T2	0.719822	0.848423	117	17.1888	<0.01	5.67631	<0.01
	Ti	T1	0.764128	0.874144	117	19.3016	<0.01	5.20819	<0.01
		T2	0.817994	0.90443	117	22.7343	<0.01	4.57501	<0.01
	Ta	T1	0.722663	0.850096	117	17.3106	<0.01	5.64746	<0.01
		T2	0.793309	0.890679	117	21.0092	<0.01	4.87539	<0.01
