# Supplementary material for: New Components of Drosophila Leg Development Identified through Genome Wide Association Studies
Source: PLoS One. 2013 Apr 1;8(4):e60261. doi: 10.1371/journal.pone.0060261 (PMC3613359; doi:10.1371/journal.pone.0060261)
Supplement: Table S6 — Top candidate genes. Candidates were sorted using Fisher's method for combining P-values to identify SNPs with the highest summary statistic (Fishers) in all four measurements (T1 and T2 and Males and Females). Candidate genes were identified by proximity to SNPs In cases where multiple SNPs identified a candidate, only the most significant SNP position is shown. FlyBase IDs are included in this table. (XLS) [file pone.0060261.s008.xls]

## Sheet: Sheet1
Chr	position	FishersSummary Statistic	Gene	FB ID	Locaton	Leg Segment
X	2362060	98.769	boi	FBgn0040388	intron	Femur
3L	18875409	95.013	CG3961	FBgn0036821	intron	Femur
3L	6503528	86.931	sfl	FBgn0020251	intron	Femur
2R	19724480	85.348	CG5549	FBgn0034911	exon	Femur
3L	2800633	84.466	CG43444	FBgn0263392	intron	Femur
X	8773421	83.672	Moe	FBgn0011661	intron	Femur
3L	10876047	79.594	CG7949	FBgn0036107	5'UTR	Femur
2L	1717804	78.245	CG18317	FBgn0031359	exon	Femur
X	2224434	78.055	CR33218; phl*	FBgn0053218; FBgn0003079	intron; intron	Femur
2R	10582312	78.048	mspo	FBgn0020269	intron	Femur
3L	10836603	77.223	nearest >14kb away			Femur
2L	19900928	77.1	sick	FBgn0263873	intron	Femur
X	14348501	76.484	dpr8	FBgn0052600	intron	Femur
2R	19736536	76.281	ytr; eIF6	FBgn0021895; FBgn0034915	intron; 200bp DS	Femur
3L	5751724	76.233	Ubp64E	FBgn0016756	intron	Femur
2R	19727517	75.438	snoRNA			Femur
2R	1780461	75.105	CG43366	FBgn0263109	1kb US	Femur
2R	19716887	74.798	CG4763	FBgn0034910	4kb US	Femur
2L	3413102	74.608	pgant2; CG8840; CG31952	FBgn0031530; FBgn0031531; FBgn0051952	intron; 2kb DS; 4kb US	Femur
2R	13435137	74.442	RpL18A; MESR4	FBgn0010409; FBgn0034240	140bpUS; 200bpUS	Femur
2L	12445302	86.905	Oatp33Ea	FBgn0032433	intron	Tibia
2R	4153605	84.423	CG30375	FBgn0050375	exon	Tibia
2R	4155864	84.008	CG30371	FBgn0050371	intron	Tibia
X	15999736	83.014	CG42353; CG42354	FBgn0259699; FBgn0259700	1kbUS	Tibia
3R	14444206	82.858	CG14304; qin*; CG7695	FBgn0038629; FBgn0263974; FBgn0038631	intron; intron; 1kb US	Tibia
3L	1263330	82.773	CG9134	FBgn0035199	intron	Tibia
3R	26494838	81.363	nearest >15kb away			Tibia
3L	4318228	80.741	CG32251	FBgn0052251	intron	Tibia
2L	3857356	80.537	CG3964	FBgn0031574	5kb US	Tibia
2L	12439700	80.489	Elf	FBgn0020443	3'UTR	Tibia
3L	1251041	79.985	CG9129	FBgn0035196	exon	Tibia
X	13758619	79.633	mamo; CG11071	FBgn0263115; FBgn0030532	1kb DS; 7kb US	Tibia
2R	1968982	79.626	Ars2	FBgn0033062	intron	Tibia
3L	12503800	79.622	sti	FBgn0002466	exon	Tibia
3L	1277747	79.551	CG32333	FBgn0052333	intron	Tibia
2L	14776072	78.476	CG4650	FBgn0032549	1kbUS	Tibia
X	2104590	78.036	msta	FBgn0053548	intron	Tibia
X	10655180	77.985	Tango5	FBgn0052675	intron	Tibia
3L	5329057	77.432	lama	FBgn0016031	7kb DS	Tibia
2L	1824244	76.656	CG31664; CG31933	FBgn0051664; FBgn0051933	30bp DS; 1kb US	Tibia
2R	10863972	108.596	ckn	FBgn0033987	intron	Tarsus
3R	14444206	93.25	CG14304; qin*; CG7695	FBgn0038629; FBgn0263974; FBgn0038631	intron; intron; 1kb US	Tarsus
3L	17934562	92.601	CG43174; CG43173	FBgn0262793; FBgn0262792	intron; 6kb DS	Tarsus
X	2362060	83.531	boi	FBgn0040388	intron	Tarsus
3L	4839460	82.927	CG13707	FBgn0035578	3'UTR	Tarsus
2L	8037802	82.673	CG7367; Cka	FBgn0031976; FBgn0044323	intron; CDS	Tarsus
2L	1644332	82.352	chinmo	FBgn0086758	7kb US	Tarsus
2R	18561440	82	RYBP	FBgn0034763	700bp DS	Tarsus
X	16033169	80.719	disco-r	FBgn0042650	intron	Tarsus
3R	9868769	79.962	CG9922	FBgn0038196	7kb US	Tarsus
3L	18897328	79.557	CSN1b	FBgn0027057	exon	Tarsus
3L	14574324	79.122	HGTX	FBgn0040318	2kb DS	Tarsus
3L	18898485	78.751	CG6841	FBgn0036828	5'UTR	Tarsus
3L	6503528	78.051	sfl	FBgn0020251	intron	Tarsus
3R	16825410	78.038	Calx; CG10827	FBgn0013995; FBgn0038845	intron; 5kb DS	Tarsus
3L	18901900	77.595	IR75d; CG14077	FBgn0036829; FBgn0036830	intron; intron	Tarsus
3L	13492097	77.441	CG10741	FBgn0036373	intron	Tarsus
3R	26494838	77.373	nearest >15kb away			Tarsus
X	5256864	77.294	SK	FBgn0029761	intron	Tarsus
3L	10628517	77.213	E(z)	FBgn0000629	exon	Tarsus
