# Supplementary material for: New Components of Drosophila Leg Development Identified through Genome Wide Association Studies
Source: PLoS One. 2013 Apr 1;8(4):e60261. doi: 10.1371/journal.pone.0060261 (PMC3613359; doi:10.1371/journal.pone.0060261)
Supplement: Table S8 — Possibility of paralogs. Probable = Genes with potential paralogs. Genes with known redundant paralogs are labeled as “Yes” along with the name of the paralog. The five candidates that gave antenna-to-leg transformation with the Dll driver are marked with an asterisk. (XLS) [file pone.0060261.s010.xls]

## Sheet: Sheet1
Gene	Paralogs?	Associated segments
bnl	-	Tibia
boi	Yes - ihog	Femur
CG10947	-	Femur
CG13707	-	Tarsus
CG15012	-	Tarsus
CG18317	Probable	Femur
CG30371*	Probable	Tibia
CG32333*	-	Tibia
CG3961	May share functions with non-paralogs	Femur
CG43444	-	Femur
CG6841	-	Tarsus
CG7695	-	Tibia
CG9129*	Probable	Tibia
CG9134	-	Tibia
chinmo	-	Tarsus
Cka	-	Tarsus
ckn	-	Tarsus
CSN1b	-	Tarsus
disco-r*	Yes - disco	Tarsus
eIF6	-	Femur
GlcT-1	-	Femur
mys	Probable	Tarsus
PI31	-	Femur
Piezo*	Probable	Tibia
RYBP	-	Tarsus
sick	-	Femur
